# Supplementary material for: β–Lactam TRPM8 Antagonist RGM8-51 Displays Antinociceptive Activity in Different Animal Models
Source: MDPI journal article supplement (doi:10.3390/ijms23052692), 2022-02-28
Supplement: s1 [file s1]

# **$\beta$ -Lactam TRPM8 antagonist RGM8-51 displays antinociceptive activity in different animal models**

Cristina Martín-Escura, Alicia Medina-Peris, Luke A. Spear and Roberto de la Torre Martínez, Luis A. Olivos-Oré, María Victoria Barahona, Sara González-Rodríguez, Gregorio Fernández-Ballester, Asia Fernández-Carvajal, Antonio R. Artalejo, Antonio Ferrer-Montiel, Rosario González-Muñiz

**Supporting Information**

Table S1. Preliminary pharmacokinetic profile of **RGM8-51**.

| Compound           | Solubility<br>( $\mu$ M) <sup>a</sup> in<br>simulated<br>gastric fluid | Log<br>D | Permeability<br>A-B <sup>b</sup> (%) | Permeability<br>B-A <sup>b</sup> (%) | Binding<br>to<br>proteins<br>(%) | Metabolism<br>t <sub>1/2</sub> (min) <sup>c</sup> | Metabolism<br>Clint <sup>c</sup><br>( $\mu$ L/min/mg) |
|--------------------|------------------------------------------------------------------------|----------|--------------------------------------|--------------------------------------|----------------------------------|---------------------------------------------------|-------------------------------------------------------|
| <b>RGM8-51</b>     | 198.3                                                                  | 5.77     | 0                                    | 0                                    | 100                              | 11.3                                              | 613.6                                                 |
| <b>Warfarin</b>    |                                                                        |          |                                      |                                      | 99                               |                                                   |                                                       |
| <b>Tamoxifen</b>   |                                                                        | 4.64     |                                      |                                      |                                  |                                                   |                                                       |
| <b>Terfenadine</b> |                                                                        |          |                                      |                                      |                                  | 7.0                                               | 971.9                                                 |
| <b>Propanolol</b>  |                                                                        |          | 70                                   | 74                                   |                                  | >60                                               | <115                                                  |

Studies performed at Eurofins-Cerep following their standard assays (see experimental methods for details). One experiment in duplicate

<sup>a</sup> Aqueous solubility ( $\mu$ M). Values: 193.99, 202.64.

<sup>b</sup> CACO-2 cell monolayer. A-B, percentage of compound in the acceptor cell. Values 0.01-0.04

<sup>c</sup> Liver microsomes culture. Values: 11.6, 11.0.
